# Supplementary material
Source: ML conference proceedings conference paper supplement (https://aclanthology.org/D18-1404)
Supplement: Attachment [file D18-1404.Attachment.zip]

## Appendices

### A Model Hyperparameters

We provide all the hyperparameters used to train our models in Table 1.

| Type                   | Values             | Models                                                                                                                                                              |
|------------------------|--------------------|---------------------------------------------------------------------------------------------------------------------------------------------------------------------|
| # of Enriched Patterns | 19,820             | CNN <sub>BASIC</sub>                                                                                                                                                |
|                        | 160,905            | CARER <sub>ch</sub>                                                                                                                                                 |
|                        | 187,648            | CARER <sub><math>\beta</math></sub>                                                                                                                                 |
|                        | 476,174            | CARER, CARER <sub>EK</sub>                                                                                                                                          |
| Size of Embedding      | (10,000, 300)      | RNN <sub>w2v</sub> , Bi-GRNN                                                                                                                                        |
|                        | (10,696, 300)      | fastText <sub>ch</sub>                                                                                                                                              |
|                        | (80,000, 300)      | EmoNet                                                                                                                                                              |
|                        | (1,859,184, 200)   | CNN <sub>w2v</sub>                                                                                                                                                  |
|                        | (3,000,000, 300)   | CNN <sub>char</sub>                                                                                                                                                 |
| Window Size            | (3)                | CNN <sub>w2v</sub>                                                                                                                                                  |
|                        | (3, 16)            | CARER, CARER <sub><math>\beta</math></sub> , CARER <sub>EK</sub> , CNN <sub>BASIC</sub>                                                                             |
|                        | (1, 3, 8)          | CARER <sub>ch</sub> , fastText <sub>ch</sub>                                                                                                                        |
|                        | (3, 4, 5)          | CNN <sub>char</sub>                                                                                                                                                 |
| # of Filters           | 100                | CNN <sub>char</sub>                                                                                                                                                 |
|                        | 256                | CARER, CARER <sub><math>\beta</math></sub> , CARER <sub>EK</sub> , CARER <sub>ch</sub> , CNN <sub>BASIC</sub> , CNN <sub>w2v</sub> , fastText <sub>ch</sub>         |
| Learning Rate          | 0.001              | EmoNet, RNN <sub>w2v</sub> , Bi-GRNN                                                                                                                                |
| Hid. Layer Dim.        | (256)              | RNN <sub>w2v</sub> , Bi-GRNN                                                                                                                                        |
|                        | (1024)             | CNN <sub>w2v</sub>                                                                                                                                                  |
|                        | (512, 128)         | CARER, CARER <sub><math>\beta</math></sub> , CARER <sub>EK</sub> , CARER <sub>ch</sub> , CNN <sub>BASIC</sub> , fastText <sub>ch</sub>                              |
|                        | (1000, 1000, 1000) | EmoNet                                                                                                                                                              |
| Conv Dropout           | 0.3                | CARER, CARER <sub><math>\beta</math></sub> , CARER <sub>EK</sub> , CARER <sub>ch</sub> , CNN <sub>BASIC</sub> , CNN <sub>w2v</sub> , fastText <sub>ch</sub>         |
|                        | 0.5                | EmoNet                                                                                                                                                              |
| Dense Dropout          | 0.2                | RNN <sub>w2v</sub> , Bi-GRNN                                                                                                                                        |
|                        | 0.5                | CARER, CARER <sub><math>\beta</math></sub> , CARER <sub>EK</sub> , CARER <sub>ch</sub> , CNN <sub>BASIC</sub> , fastText <sub>ch</sub> , EmoNet                     |
| Batch Size             | 50                 | CNN <sub>char</sub>                                                                                                                                                 |
|                        | 128                | CARER, CARER <sub><math>\beta</math></sub> , CARER <sub>EK</sub> , CARER <sub>ch</sub> , CNN <sub>BASIC</sub> , fastText <sub>ch</sub> , EmoNet, CNN <sub>w2v</sub> |
|                        | 256                | RNN <sub>w2v</sub> , Bi-GRNN                                                                                                                                        |
| Epoch                  | 3                  | CARER <sub><math>\beta</math></sub>                                                                                                                                 |
|                        | 4                  | CARER                                                                                                                                                               |
|                        | 7                  | EmoNet                                                                                                                                                              |
|                        | 8                  | CARER <sub>EK</sub>                                                                                                                                                 |
|                        | 12                 | CARER <sub>ch</sub> , fastText <sub>ch</sub> , Bi-GRNN                                                                                                              |
|                        | 20                 | CNN <sub>BASIC</sub>                                                                                                                                                |
|                        | 22                 | CNN <sub>w2v</sub>                                                                                                                                                  |
|                        | 24                 | RNN <sub>w2v</sub>                                                                                                                                                  |
|                        | 50                 | CNN <sub>char</sub>                                                                                                                                                 |

Table 1: Hyperparameters of proposed models.

## B CARER for Traditional Chinese

**CARER<sub>ch</sub>** is a model trained to support emotion recognition on a Traditional Chinese dataset. The dataset is crawled from comments found in *Facebook Fanpages*. We selected 11,268 fan pages, which contain high engagement between Chinese-speaking Facebook users, on topics such as religion, politics, news press, YouTubers, parenting, life, comics, gaming, etc. Users' comments on fan pages are considered for the dataset, with emotion labels automatically determined by the *emoji reaction* of the commenting users on the root post. Only four emotions are considered: *anger*, *joy*, *sadness*, and *surprise*. A total of 10 million comments were retrieved and tokenized through point-wise mutual information. Comments containing less than four or greater than 100 tokens are purged, which resulted in a dataset of 718,852 comments. The dataset is split into a training and testing dataset using a 90/10 split. The emotion distribution of each dataset is provided below:

| Training Dataset |         |
|------------------|---------|
| Emotion          | Amount  |
| joy              | 168,404 |
| anger            | 168,203 |
| surprise         | 159,989 |
| sadness          | 150,370 |

  

| Testing Dataset |        |
|-----------------|--------|
| Emotion         | Amount |
| joy             | 18,734 |
| anger           | 18,601 |
| surprise        | 17,791 |
| sadness         | 16,760 |

Table 2: Data statistics of datasets used in **CARER<sub>ch</sub>**.

Chinese-based enriched patterns are then derived using the proposed graph-based feature extraction mechanism. Word clusters are formed and validated through moedict-data<sup>1</sup>. These patterns are then used to train a CNN-based emotion recognition model, similar to the one used to conduct the English experiments. We observed that since tokens containing one to three characters, a flexible range of window sizes does help the classifier to capture important features used to distinguish statements conveying different emotions.

<sup>1</sup>moedict-data is an open-sourced synonym dictionary available at <https://github.com/g0v/moedict-data>.

Consequently, window sizes of (1, 3, 8) are used for the Chinese-based emotion recognition experiment. Overall, we show that the proposed approach is not restricted to any specific language and that the enriched features are applicable to other languages and data sources.

## C English-based Emotion Lexicon

Note that a preview of the pattern-based emotion lexicon (English version) is provided as supplementary material. The zip folder (8emos.zip) contains 8 files (one for each emotion), each containing patterns and the corresponding pattern scores. (Licensed under The MIT License<sup>2</sup>)

<sup>2</sup><https://opensource.org/licenses/MIT>
