# Supplementary material
Source: ML conference proceedings conference paper supplement (https://aclanthology.org/D18-1404)
Supplement: Attachment [file D18-1404.Attachment.zip]

Archive with 3 entries (2 files):
- appendix/
- appendix/8emos.zip
- appendix/Appendix.pdf
